# Supplementary material for: Changes in the Dietary Habits of the Greek EPIC Cohort Participants during a 14-Year Follow-Up Period (1997–2011)
Source: MDPI journal article supplement (doi:10.3390/nu12072148), 2020-07-19
Supplement: s1 [file s1]

Original Article- Supplementary materials

## Supplementary materials

# Changes in the dietary habits of the Greek EPIC cohort participants during a 14-year follow-up period (1997-2011)

Nikolaos Skourlis<sup>\*1</sup>, Ioannis Patsis<sup>1</sup>, Georgia Martimianaki<sup>1</sup>, Eleni Peppas<sup>1</sup>, Antonia Trichopoulou<sup>1</sup>, Klea Katsouyanni<sup>2</sup>

<sup>1</sup> Hellenic Health Foundation; info@hhf-greece.gr

<sup>2</sup> Department of Epidemiology and Biostatistics, University of Athens

Figures S1 and S2 are stacked bar plots presenting the proportion of each answer regarding the consumption of participants compared to the baseline of the study, by FFQ (food frequency questionnaire) quartiles of baseline consumption over food group (Vegetables, Legumes, Fruits, Dairy products, Nuts, Cereals, Meat and meat products, Fish/Seafood and Olive oil) for the 1<sup>st</sup> FU-DQ (Figure S1) and the 2<sup>nd</sup> FU-DQ (Figure S2). The answers are grouped as “More”/“Much More”, “Same”, “Less/Much less” and “None/Do not remember”.

Table S1 shows in detail the frequency of each FU-DQ answer category (“Much more”, “More”, “Same”, “Less”, “Much Less”, “None”, “Do not Remember”) regarding consumption of vegetables, fruit, legumes, cereals, dairy products, meat and fish/seafood, olive oil and nuts comparative to their corresponding intake at recruitment, by FU-DQ period.

**Figure S1.** Graphical representation (are stacked bar plot) of the frequencies of responses from the participants by food group and FFQ quartiles of baseline consumption during the 1st FU-DQ period

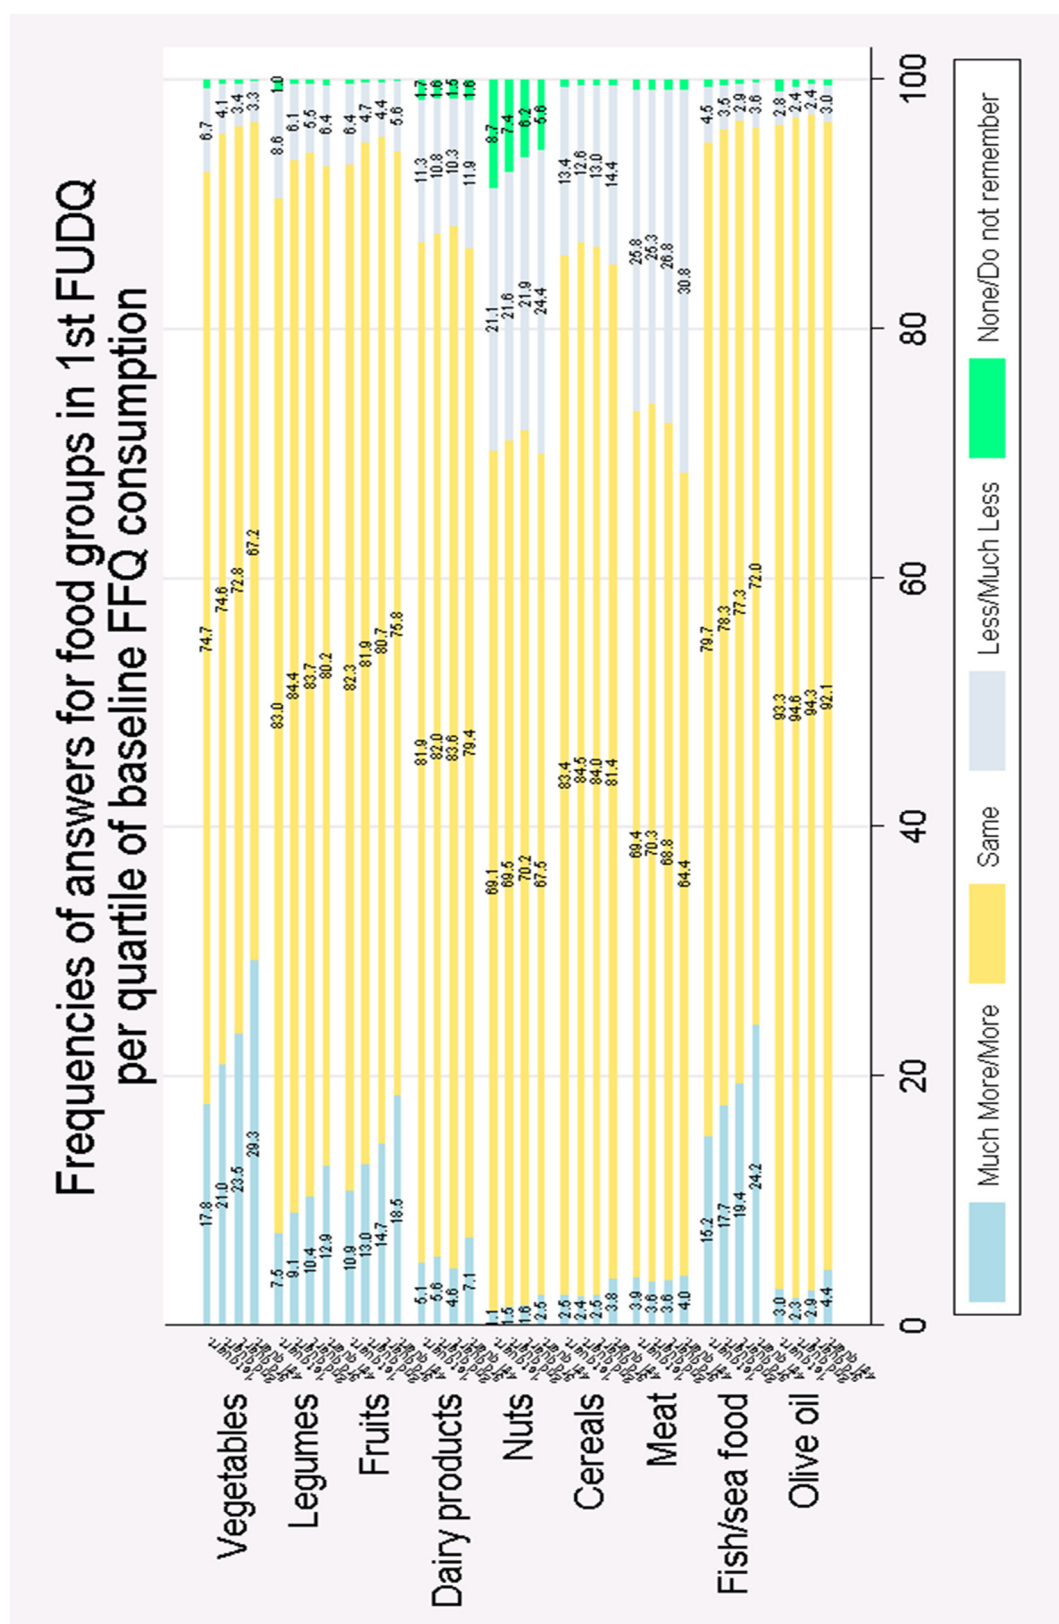

**Figure S2.** Graphical representation of the frequencies of responses from the participants by food group and FFQ quartiles of baseline consumption during the 2nd FU-DQ period

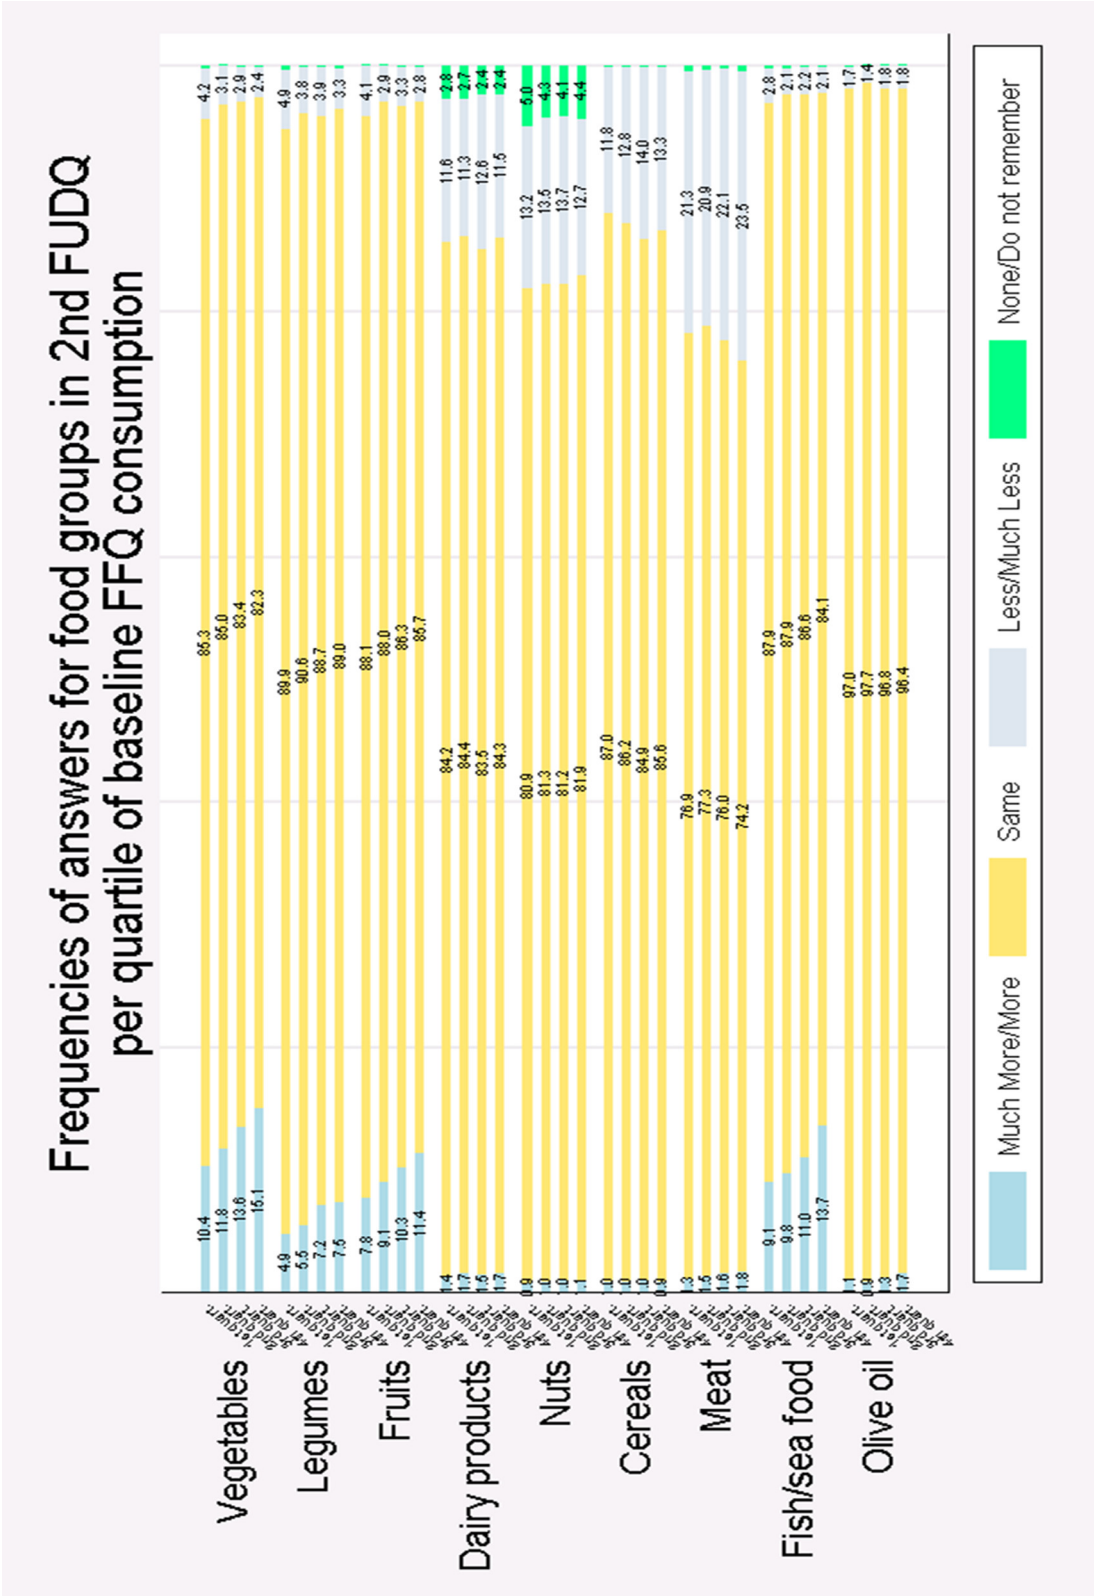

Proportions less than 1% are not depicted with numbers

**Table S1.** Number and percentages (%) of participants' responds regarding consumption of vegetables, fruit, legumes, cereals, dairy products, red meat and fish/seafood, olive oil and nuts comparative to their corresponding intake at recruitment, by FU-DQ period. The EPIC-Greece study.

| Food item/group | Period<br>FUDQ | Much More  | More         | Same          | Less         | Much less   | None        | Do not Remember | Total |
|-----------------|----------------|------------|--------------|---------------|--------------|-------------|-------------|-----------------|-------|
|                 |                | N(%)       | N(%)         | N(%)          | N(%)         | N (%)       | N(%)        |                 |       |
| Vegetables      | 1              | 278 (1.25) | 4812 (21.67) | 16070 (72.35) | 764 (3.44)   | 201 (0.9)   | 68 (0.31)   | 17 (0.08)       | 22210 |
|                 | 2              | 117 (0.63) | 2243 (12.16) | 15487 (83.94) | 429 (2.33)   | 148 (0.8)   | 24 (0.13)   | 2 (0.01)        | 18450 |
| Cereals         | 1              | 13 (0.06)  | 604 (2.72)   | 18529 (83.43) | 2333 (10.5)  | 616 (2.77)  | 92 (0.41)   | 23 (0.1)        | 22210 |
|                 | 2              | 6 (0.03)   | 176 (0.95)   | 15846 (85.89) | 1972 (10.69) | 425 (2.3)   | 23 (0.12)   | 2 (0.01)        | 18450 |
| Legumes         | 1              | 82 (0.37)  | 2140 (9.64)  | 18404 (82.86) | 1130 (5.09)  | 328 (1.48)  | 106 (0.48)  | 20 (0.09)       | 22210 |
|                 | 2              | 29 (0.16)  | 1129 (6.12)  | 16519 (89.53) | 563 (3.05)   | 171 (0.93)  | 37 (0.2)    | 2 (0.01)        | 18450 |
| Fruits          | 1              | 195 (0.88) | 2981 (13.42) | 17803 (80.16) | 956 (4.3)    | 212 (0.95)  | 46 (0.21)   | 17 (0.08)       | 22210 |
|                 | 2              | 73 (0.4)   | 1711 (9.27)  | 16052 (87)    | 504 (2.73)   | 96 (0.52)   | 12 (0.07)   | 2 (0.01)        | 18450 |
| Dairy products  | 1              | 50 (0.23)  | 1185 (5.34)  | 18147 (81.71) | 1963 (8.84)  | 490 (2.21)  | 356 (1.6)   | 19 (0.09)       | 22210 |
|                 | 2              | 9 (0.05)   | 280 (1.52)   | 15521 (84.12) | 1650 (8.94)  | 519 (2.81)  | 469 (2.54)  | 2 (0.01)        | 18450 |
| Meat            | 1              | 20 (0.09)  | 820 (3.69)   | 15164 (68.28) | 4881 (21.98) | 1148 (5.17) | 160 (0.72)  | 17 (0.08)       | 22210 |
|                 | 2              | 3 (0.02)   | 282 (1.53)   | 14033 (76.06) | 3390 (18.37) | 665 (3.6)   | 75 (0.41)   | 2 (0.01)        | 18450 |
| Fish/ Seafood   | 1              | 253 (1.14) | 3976 (17.9)  | 17085 (76.92) | 649 (2.92)   | 155 (0.7)   | 75 (0.34)   | 17 (0.08)       | 22210 |
|                 | 2              | 65 (0.35)  | 1954 (10.59) | 15971 (86.56) | 345 (1.87)   | 81 (0.44)   | 32 (0.17)   | 2 (0.01)        | 18450 |
| Nuts            | 1              | 13 (0.06)  | 360 (1.62)   | 15351 (69.12) | 3309 (14.9)  | 1634 (7.36) | 1514 (6.82) | 29 (0.13)       | 22210 |
|                 | 2              | 5 (0.03)   | 175 (0.95)   | 14999 (81.3)  | 1631 (8.84)  | 827 (4.48)  | 811 (4.4)   | 2 (0.01)        | 18450 |
| Olive oil       | 1              | 116 (0.52) | 606 (2.73)   | 20769 (93.51) | 467 (2.1)    | 117 (0.53)  | 121 (0.54)  | 14 (0.06)       | 22210 |
|                 | 2              | 5 (0.03)   | 227 (1.23)   | 17893 (96.98) | 263 (1.43)   | 50 (0.27)   | 10 (0.05)   | 2 (0.01)        | 18450 |
